# Supplementary material
Source: ML conference proceedings conference paper supplement (https://openreview.net/forum?id=dF1tD9hjvn)
Supplement: supplementary_material [file attachment]

## 883 A Results

884 In Table 4, we show a summary of the results of AlgoTuner for each of the four frontier models tests.  
885 In Table 5, we detail the per-task timings for every model and task.

Table 4: AlgoTuner speedup when using each LM, with a budget of \$0.5 for each task. Speedup percentage is calculated as the percentage of tasks for which AlgoTuner gets at least a  $1.1\times$  speedup.

|                       | o4-mini-high | R1    | Claude 3.7 Sonnet | Gemini 2.5 Pro |
|-----------------------|--------------|-------|-------------------|----------------|
| Pct. of Tasks Sped Up | 53.3%        | 42.5% | 34.2%             | 34.2%          |

Table 5: Per task speedup for AlgoTuner, using four frontier LMs. Speedup is calculated as the ratio between the reference solve function’s time and the LM-generated solve function’s time.

| Task                             | o4-mini-high | R1     | Claude 3.7 Sonnet | Gemini 2.5 Pro |
|----------------------------------|--------------|--------|-------------------|----------------|
| affine_transform_2d              | 1.00         | 1.00   | 1.00              | 1.00           |
| articulation_points              | 4.75         | 1.00   | 1.45              | 1.00           |
| base64_encoding                  | 1.01         | 1.00   | 1.00              | 1.00           |
| btsp                             | 74.47        | 4.02   | 3.23              | 6.74           |
| capacitated_facility_location    | 8.16         | 8.19   | 1.00              | 1.00           |
| chacha_encryption                | 1.00         | 1.00   | 1.00              | 1.00           |
| channel_capacity                 | 1.00         | 1.73   | 1.71              | 1.57           |
| chebyshev_center                 | 1.78         | 2.21   | 1.23              | 1.13           |
| cholesky_factorization           | 2.17         | 1.00   | 1.00              | 1.00           |
| clustering_outliers              | 1.11         | 1.00   | 1.06              | 1.18           |
| communicability                  | 217.10       | 162.59 | 183.45            | 166.40         |
| convex_hull                      | 2.18         | 1.00   | 1.00              | 1.00           |
| convex_quadratic_check           | 96.58        | 2.52   | 6.05              | 6.62           |
| convolve2d_full_fill             | 272.12       | 229.80 | 227.84            | 229.30         |
| convolve_1d                      | 1.00         | 1.00   | 1.00              | 1.00           |
| correlate_1d                     | 1.62         | 1.00   | 1.54              | 1.00           |
| count_connected_components       | 6.86         | 1.00   | 3.92              | 3.44           |
| count_riemann_zeta_zeros         | 1.00         | 1.00   | 1.02              | 1.00           |
| crew_pairing                     | 1.00         | 1.00   | 1.00              | 1.00           |
| cumulative_simpson_multid        | 1.00         | 1.00   | 1.00              | 1.00           |
| cyclic_independent_set           | 1.00         | 1.00   | 1.00              | 1.00           |
| determinant_matrix_exponential   | 416.78       | 1.00   | 277.06            | 395.17         |
| dijkstra_from_indices            | 1.64         | 1.00   | 1.00              | 1.00           |
| discrete_log                     | 1.28         | 1.00   | 1.00              | 1.00           |
| dynamic_assortment_planning      | 2.45         | 1.08   | 1.00              | 28.82          |
| earth_movers_distance            | 1.00         | 1.17   | 1.09              | 1.00           |
| edge_expansion                   | 25.22        | 1.00   | 1.00              | 1.00           |
| efficiency                       | 71.63        | 2.76   | 1.07              | 1.11           |
| eigenvalues_complex              | 1.47         | 1.52   | 1.47              | 1.45           |
| eigenvalues_real                 | 2.43         | 2.44   | 2.39              | 2.41           |
| eigenvectors_complex             | 1.03         | 1.00   | 1.00              | 1.02           |
| eigenvectors_real                | 1.03         | 1.06   | 1.01              | 1.02           |
| elementwise_integration          | 1.01         | 1.00   | 1.00              | 1.00           |
| feedback_controller_design       | 119.25       | 1.00   | 1.00              | 1.00           |
| fft_real_scipy_fftpack           | 2.98         | 2.66   | 1.00              | 1.00           |
| generalized_eigenvalues_complex  | 3.84         | 2.04   | 2.04              | 2.02           |
| generalized_eigenvalues_real     | 2.55         | 2.98   | 2.52              | 1.00           |
| generalized_eigenvectors_complex | 2.84         | 1.06   | 1.06              | 1.05           |
| generalized_eigenvectors_real    | 1.72         | 1.71   | 1.52              | 1.15           |
| graph_coloring                   | 27.19        | 1.18   | 1.00              | 1.08           |
| graph_isomorphism                | 56.73        | 19.68  | 24.62             | 1.98           |
| graph_laplacian                  | 1.48         | 1.00   | 1.08              | 1.57           |

Continued on next page

Table 5 – continued from previous page

| Task                         | o4-mini-high | R1     | Claude 3.7 Sonnet | Gemini 2.5 Pro |
|------------------------------|--------------|--------|-------------------|----------------|
| gzip_compression             | 1.00         | 1.00   | 1.00              | 1.00           |
| job_shop_scheduling          | 1.42         | 1.75   | 1.40              | 1.48           |
| kalman_filter                | 71.08        | 2.96   | 1.00              | 1.00           |
| kcenters                     | 1.00         | 1.00   | 1.00              | 1.00           |
| kd_tree                      | 1.23         | 1.20   | 1.00              | 1.01           |
| kernel_density_estimation    | 1.00         | 1.00   | 1.00              | 1.00           |
| kmeans                       | 32.30        | 1.00   | 1.00              | 1.02           |
| ks_test_2samp                | 1.00         | 1.03   | 1.03              | 1.00           |
| l0_pruning                   | 3.98         | 3.15   | 1.00              | 2.68           |
| l1_pruning                   | 2.94         | 2.84   | 1.27              | 1.40           |
| lasso                        | 1.00         | 1.00   | 1.00              | 1.00           |
| linear_system_solver         | 1.10         | 1.12   | 1.09              | 1.09           |
| lp_box                       | 2.26         | 14.19  | 1.53              | 2.25           |
| lp_centering                 | 1.00         | 1.00   | 1.00              | 1.00           |
| lqr                          | 1.05         | 1.00   | 1.10              | 1.00           |
| lu_factorization             | 1.00         | 1.00   | 1.00              | 1.00           |
| markowitz                    | 1.00         | 1.00   | 1.00              | 1.01           |
| matrix_exponential           | 1.01         | 1.00   | 3.79              | 1.00           |
| matrix_multiplication        | 1.08         | 1.06   | 1.09              | 1.08           |
| matrix_sqrt                  | 1.02         | 1.00   | 1.04              | 1.00           |
| max_clique                   | 21.15        | 1.26   | 3.80              | 2.66           |
| max_common_subgraph          | 20.94        | 1.00   | 1.56              | 1.47           |
| max_flow_min_cost            | 3.04         | 20.46  | 2.09              | 1.00           |
| max_independent_set          | 1.00         | 1.63   | 1.00              | 1.51           |
| max_weighted_independent_set | 71.37        | 9.55   | 1.04              | 1.00           |
| min_weight_assignment        | 1.42         | 1.25   | 1.00              | 1.00           |
| minimum_spanning_tree        | 30.88        | 3.94   | 33.52             | 12.50          |
| minimum_volume_ellipsoid     | 1.00         | 1.00   | 1.00              | 1.00           |
| multi_dim_knapsack           | 1.52         | 1.48   | 1.37              | 1.00           |
| nmf                          | 1.00         | 1.00   | 1.00              | 1.00           |
| ode_fitzhughnagumo           | 1.00         | 1.00   | 1.00              | 1.00           |
| ode_hires                    | 10.72        | 5.58   | 1.00              | 5.49           |
| ode_lorenz96_nonchaotic      | 1.00         | 1.00   | 1.00              | 1.00           |
| ode_nbodyproblem             | 1.00         | 1.00   | 1.00              | 1.00           |
| ode_stiff_robertson          | 18.79        | 1.00   | 1.66              | 4.89           |
| ode_stiff_vanderpol          | 1.00         | 1.00   | 1.00              | 1.00           |
| odr                          | 1.01         | 1.00   | 1.00              | 1.00           |
| pagerank                     | 1.00         | 1.00   | 1.00              | 1.57           |
| pca                          | 3.77         | 1.00   | 3.60              | 1.54           |
| pde_burgers1d                | 1.00         | 1.00   | 1.00              | 1.00           |
| pde_heat1d                   | 1.00         | 1.00   | 1.00              | 1.00           |
| polynomial_mixed             | 1.02         | 1.01   | 1.00              | 1.01           |
| polynomial_real              | 23.60        | 142.29 | 1.00              | 1.00           |
| portfolio_optimization_cvar  | 1.00         | 10.72  | 8.25              | 1.15           |
| procrustes                   | 1.23         | 1.04   | 1.03              | 1.04           |
| psd_cone_projection          | 10.16        | 8.78   | 9.30              | 7.34           |
| qp                           | 1.75         | 1.76   | 1.01              | 1.00           |
| qr_factorization             | 1.98         | 1.17   | 1.16              | 1.00           |
| quantile_regression          | 1.27         | 1.00   | 1.00              | 1.03           |
| queens_with_obstacles        | 1.42         | 2.40   | 1.00              | 1.38           |
| queuing                      | 76.82        | 6.72   | 1.00              | 1.00           |
| qz_factorization             | 1.00         | 1.01   | 1.01              | 1.01           |
| randomized_svd               | 5.66         | 3.84   | 1.26              | 1.98           |
| rbf_interpolation            | 1.00         | 1.00   | 1.00              | 1.00           |
| rectanglepacking             | 1.67         | 7.54   | 1.00              | 1.55           |
| robust_linear_program        | 1.00         | 1.07   | 458.28            | 1.00           |
| rotate_2d                    | 1.00         | 1.00   | 1.00              | 1.00           |
| set_cover_conflicts          | 31.03        | 4.97   | 4.49              | 4.92           |
| set_cover                    | 1.84         | 1.35   | 1.44              | 1.34           |
| sha256_hashing               | 1.00         | 1.00   | 1.00              | 1.00           |
| shift_2d                     | 1.00         | 1.00   | 1.00              | 1.00           |

Continued on next page

Table 5 – continued from previous page

| Task                        | o4-mini-high | R1     | Claude 3.7 Sonnet | Gemini 2.5 Pro |
|-----------------------------|--------------|--------|-------------------|----------------|
| shortest_path_dijkstra      | 2.31         | 2.50   | 53.17             | 2.46           |
| sparse_eigenvectors_complex | 1.00         | 1.00   | 1.00              | 1.00           |
| spectral_clustering         | 1.00         | 68.34  | 1.00              | 1.00           |
| stable_matching             | 1.05         | 1.00   | 1.00              | 1.00           |
| toeplitz_solver             | 1.00         | 1.00   | 1.00              | 1.00           |
| tsp                         | 1.00         | 1.27   | 1.00              | 1.09           |
| two_eigenvalues_around_0    | 1.41         | 1.65   | 1.01              | 1.58           |
| unit_simplex_projection     | 1.92         | 1.05   | 1.05              | 1.05           |
| vector_quantization         | 1.00         | 1.00   | 1.00              | 1.00           |
| vectorized_newton           | 1.00         | 1.00   | 1.00              | 1.00           |
| vehicle_routing             | 1.00         | 1.17   | 1.00              | 1.00           |
| vehicle_routing_circuit     | 1.00         | 1.47   | 1.01              | 1.00           |
| vertex_cover                | 12.04        | 1.07   | 12.52             | 1.23           |
| vertex_cover_cpsat          | 14.36        | 1.44   | 1.00              | 1.19           |
| wasserstein_dist            | 8.15         | 7.52   | 1.00              | 6.78           |
| water_filling               | 418.00       | 346.88 | 109.62            | 81.21          |
| zoom_2d                     | 1.00         | 1.00   | 1.00              | 1.00           |

## C AlgoTuner Agent Setup

**Initial Prompt.** The LM receives an initial message, consisting of general instructions on how to use the system (see §C.1), Numba (Lam et al., 2015), Dask (Rocklin, 2015), and Cython (Behnel et al., 2011) (for a full list see Appendix E). Additionally, the LM is given the task’s description, which includes input and output descriptions and examples, as well as the task’s `solve` and `is_solution` functions. In essence, everything apart from the problem generating function is shown to the LM.

**Using the Interface.** The goal of the LM is to write a `Solver` class with a `solve()` function that takes problem instances and produces a correct output. To do this, the LM sends messages that must consist of exactly one thought and one command (Yao et al., 2023). Responses given by the system always start with a budget status, for example: You have so far sent 3 messages, and used up \$0.08. You have \$0.42 remaining. We use the LiteLLM (BerriAI, 2025) API to access all models used. Each model is limited to a budget of \$0.50 per task, and is continuously prompted until its budget runs out. The budget includes both input and output tokens. Where applicable, we set the temperature to 0 and the `top_p` parameter to 0.95.

**Commands.** We detail the available system commands in Table 6. Following Yang et al. (2024) after an edit command is used the modified code is ran through a linter. If the linter raises errors, the code is reverted, and the linter errors are sent back to the LM. When there are no linter errors, the code is evaluated on 100 training samples, with results sent back to the LM. When there are runtime errors, those are also sent back to the LM. When there are no runtime errors, the performance score, along with average evaluation time is reported back to the LM. If the performance score reached is better than any score previously reached, the code state is saved.

Table 6: Available interface commands.

| Command       | Description                                                                           |
|---------------|---------------------------------------------------------------------------------------|
| edit          | Replace a range of lines in a file with new content. Can create new files.            |
| delete        | Remove a range of lines from a file.                                                  |
| ls            | List all files in the current working directory.                                      |
| view_file     | Display 100 lines of a file from a specified start line.                              |
| revert        | Revert all files to the best-performing version of the code.                          |
| reference     | Get the reference solve’s solution for a given input                                  |
| eval          | Evaluate the current solve function on the 100 training instances and report results. |
| eval_input    | Run the solver on a given input and compare with the oracle.                          |
| profile       | Profile the performance of the solve method on a given input.                         |
| profile_lines | Profile specified lines on a given input.                                             |

**Message History.** To manage conversational context within token limits, we truncate the messages send to the LM in the following manner: The initial system prompt and the full content of the most recent five user and five assistant turns are always sent, following (Yang et al., 2024). Messages older than these are truncated to the first 100 characters. If the total token count still exceeds the model’s limit, these older, content-truncated messages are progressively dropped starting from the oldest and are replaced by a single placeholder message indicating the truncation is inserted after the system prompt to signal the discontinuity.

## 915 C.1 Initial Prompt

916 We show the initial prompt given to the language model. The prompt we use is loosely modeled after  
917 the one used in SWE-Agent (Yang et al., 2024). For each task, we add a task description and the  
918 reference solver implementation (see below).

```
919 SETTING:
920 You're an autonomous programmer tasked with solving a specific problem. You
921 are to use the commands defined below to accomplish this task. Every
922 message you send incurs a cost--you will be informed of your usage and
923 remaining budget by the system.
924 You will be evaluated based on the best-performing piece of code you
925 produce, even if the final code doesn't work or compile (as long as it
926 worked at some point and achieved a score, you will be eligible).
927 Apart from the default Python packages, you have access to the following
928 additional packages:
929 - cryptography
930 - cvxpy
931 - cython
932 - dask
933 - diffrax
934 - ecos
935 - faiss-cpu
936 - hdbscan
937 - highspy
938 - jax
939 - networkx
940 - numba
941 - numpy
942 - ortools
943 - pandas
944 - pot
945 - pulp
946 - pyomo
947 - python-sat
948 - scikit-learn
949 - scipy
950 - sympy
951 - torch
952
953 YOUR TASK:
954 Your objective is to define a class named `Solver` in `solver.py` with a
955 method:
956 ...
957 class Solver:
958     def solve(self, problem, **kwargs) -> Any:
959         """Your implementation goes here."""
960         ...
961 ...
962
963 IMPORTANT: Compilation time of your init function will not count towards
964 your function's runtime.
965
966 This `solve` function will be the entrypoint called by the evaluation
967 harness. Strive to align your class and method implementation as
968 closely as possible with the desired performance criteria.
969 For each instance, your function can run for at most 10x the baseline
970 runtime for that instance. Strive to have your implementation run as
971 fast as possible, while returning the same output as the baseline
972
```

```

973     function (for the same given input). Be creative and optimize your
974     approach!
975
976 Your messages should include a short thought about what you should do,
977     followed by a _SINGLE_ command. The command must be enclosed within ```
978     and ```, like so:
979 <Reasoning behind executing the command>
980 ```
981 <command>
982 ```
983
984 IMPORTANT: Each set of triple backticks (```) must always be on their own
985     line, without any other words or anything else on that line.
986
987 Here are the commands available to you. Ensure you include one and only one
988     of the following commands in each of your responses:
989 - `edit`: Replace a range of lines with new content in a file. This is how
990     you can create files: if the file does not exist, it will be created.
991     Here is an example:
992     ```
993     edit
994     file: <file_name>
995     lines: <start_line>-<end_line>
996     ---
997     <new_content>
998     ---
999     ```
1000
1001 The command will:
1002 1. Delete the lines from <start_line> to <end_line> (inclusive)
1003 2. Insert <new_content> starting at <start_line>
1004 3. If both <start_line> and <end_line> are 0, <new_content> will be
1005     prepended to the file
1006
1007 Example:
1008 edit
1009 file: solver.py
1010 lines: 5-7
1011 ---
1012 def improved_function():
1013     print("Optimized solution")
1014 ---
1015 - `ls`: List all files in the current working directory.
1016 - `view_file <file_name> [start_line]`: Display 100 lines of `<file_name>`
1017     starting from `start_line` (defaults to line 1).
1018 - `revert`: Revert the code to the best-performing version thus far.
1019 - `baseline <string>`: Query the baseline solver with a problem and receive
1020     its solution. If the problem's input is a list, this command would
1021     look like:
1022     ```
1023     baseline [1,2,3,4]
1024     ```
1025 - `eval_input <string>`: Run your current solver implementation on the
1026     given input. This is the only command that shows stdout from your
1027     solver along with both solutions. Example:
1028     ```
1029     eval_input [1,2,3,4]
1030     ```
1031 - `eval`: Run evaluation on the current solution and report the results.

```

```

1032 - `delete`: Delete a range of lines from a file using the format:
1033     ```
1034     delete
1035     file: <file_name>
1036     lines: <start_line>-<end_line>
1037
1038     The command will delete the lines from <start_line> to <end_line> (
1039         inclusive)
1040
1041     Example:
1042     delete
1043     file: solver.py
1044     lines: 5-10
1045     ```
1046 - `profile <filename.py> <input>`: Profile your currently loaded solve
1047     method's performance on a given input. Shows the 25 most time-consuming
1048     lines. Requires specifying a python file (e.g., `solver.py`) for
1049     validation, though profiling runs on the current in-memory code.
1050     Example:
1051     ```
1052     profile solver.py [1, 2, 3]
1053     ```
1054 - `profile_lines <filename.py> <line_number1, line_number2, ...> <input>`:
1055     Profiles the chosen lines of the currently loaded code on the given
1056     input. Requires specifying a python file for validation.
1057     Example:
1058     ```
1059     profile_lines solver.py 1,2,3 [1, 2, 3]
1060     ```
1061
1062
1063 **TIPS:**
1064 After each edit, a linter will automatically run to ensure code quality. If
1065     there are critical linter errors, your changes will not be applied,
1066     and you will receive the linter's error message. Typically, linter
1067     errors arise from issues like improper indentation--ensure your edits
1068     maintain proper code formatting.
1069 **Cython Compilation:** Edits creating or modifying Cython (`.pyx`) files
1070     will automatically trigger a compilation attempt (requires a `setup.py`)
1071     . You will be notified if compilation succeeds or fails. If it fails,
1072     the edit to the `.pyx` file will be automatically reverted.
1073 You have 8 CPU cores at your disposal, you can use them for parallelization.
1074
1075 If the code runs successfully without errors, the in-memory 'last known
1076     good code' will be updated to the new version. Following successful
1077     edits, you will receive a summary of your `solve` function's
1078     performance compared to the baseline.
1079 If you get stuck, try reverting your code and restarting your train of
1080     thought.
1081 Do not put an if __name__ == "__main__": block in your code, as it will not
1082     be ran (only the solve function will).
1083 Keep trying to better your code until you run out of money. Do not stop
1084     beforehand!
1085
1086 **GOALS:**
1087 Your primary objective is to optimize the `solve` function to run as as
1088     fast as possible, while returning the optimal solution.

```

1089 You will receive better scores the quicker your solution runs, and you will  
1090 be penalized for exceeding the time limit or returning non-optimal  
1091 solutions.

1092  
1093 Below you find the description of the task you will have to solve. Read it  
1094 carefully and understand what the problem is and what your solver  
1095 should do.

1097  
1098 <task/description.txt>

1100  
1101 Here is the baseline which you will be graded against. Your task is to  
1102 write a function that produces the same output, in less time.

1104  
1105 <task.solve>

1107  
1108 This function will be used to check if your solution is valid for a given  
1109 problem. If it returns False, it means the solution is invalid:

1111  
1112 <task.is\_solution>



## 1114 C.2 AlgoTuner Interface Feedback

1115 In this section, we show the type and style of feedback given back to the LM (within the running of  
1116 AlgoTuner) in three different scenarios.

### 1117 C.2.1 Successful Edit and Evaluation

#### LM Message

```
I'll create our solver function in solver.py which transforms the generalized
eigenvalue problem into a standard one using Cholesky decomposition and
then solves it using NumPy's eigenvalue routines.
...
edit
file: solver.py
lines: 1-100
---
import numpy as np
from typing import List, Tuple

class Solver:
    @staticmethod
    def solve(problem: Tuple[List[List[float]], List[List[float]]]) -> Tuple[
List[float], List[List[float]]]:
        """
        Solve the generalized eigenvalue problem  $A x = \lambda B x$ .

        Given:
        - A: a symmetric matrix,
        - B: a symmetric positive definite matrix,
        this function computes the eigenpairs (eigenvalues and eigenvectors)
        where the eigenvectors are
        B-normalized and mutually B-orthogonal.

        The eigenvalues are returned in descending order along with their
        corresponding eigenvectors.

        :param problem: Tuple (A, B), where A and B are given as list-of-lists.
        :return: tuple (eigenvalues_list, eigenvectors_list) where:
            - eigenvalues_list is a list of eigenvalues (sorted in
            descending order),
            - eigenvectors_list is a list of eigenvectors (each a list of
            floats) corresponding to those eigenvalues.
        """
        A, B = problem
        A = np.array(A, dtype=float)
        B = np.array(B, dtype=float)

        # Use Cholesky decomposition for numerical stability when dealing with
        B
        L = np.linalg.cholesky(B)
        Linv = np.linalg.inv(L)
        Atilde = Linv @ A @ Linv.T

        # Compute eigenvalues and eigenvectors
        eigenvalues, eigenvectors = np.linalg.eigh(Atilde)

        # Transform eigenvectors back to the original space
        eigenvectors = Linv.T @ eigenvectors

        # Normalize eigenvectors with respect to the B-inner product
        for i in range(eigenvectors.shape[1]):
            v = eigenvectors[:, i]
```

1118

```

        norm = np.sqrt(np.dot(v, B @ v))
        if norm > 0:
            eigenvectors[:, i] = v / norm

    # Reverse to get descending order
    eigenvalues = eigenvalues[::-1]
    eigenvectors = eigenvectors[:, ::-1]

    # Convert to lists
    eigenvalues_list = eigenvalues.tolist()
    eigenvectors_list = [eigenvectors[:, i].tolist() for i in range(
eigenvectors.shape[1])]

    return eigenvalues_list, eigenvectors_list
---
---
```

1119

#### System Message

You have sent 2 messages and have used up \$0.0130. You have \$0.4870 remaining.

Edit successful for solver.py.

Contents of solver.py (lines 1-50 out of 53)

(| = existing code, > = modified code)

```

> 01: import numpy as np
> 02: from typing import List, Tuple
> 03:
> 04: class Solver:
> 05:     @staticmethod
> 06:     def solve(problem: Tuple[List[List[float]], List[List[float]]]) ->
    Tuple[List[float], List[List[float]]]:
> 07:         """
> 08:         Solve the generalized eigenvalue problem  $A x = \lambda B x$ .
> 09:
> 10:         Given:
> 11:         - A: a symmetric matrix,
> 12:         - B: a symmetric positive definite matrix,
> 13:         this function computes the eigenpairs (eigenvalues and
    eigenvectors) where the eigenvectors are
> 14:         B-normalized and mutually B-orthogonal.
> 15:
> 16:         The eigenvalues are returned in descending order along with their
    corresponding eigenvectors.
> 17:
> 18:         :param problem: Tuple (A, B), where A and B are given as list-of-
    lists.
> 19:         :return: tuple (eigenvalues_list, eigenvectors_list) where:
> 20:         - eigenvalues_list is a list of eigenvalues (sorted in
    descending order),
> 21:         - eigenvectors_list is a list of eigenvectors (each a
    list of floats) corresponding to those eigenvalues.
> 22:         """
> 23:         A, B = problem
> 24:         A = np.array(A, dtype=float)
> 25:         B = np.array(B, dtype=float)
> 26:
> 27:         # Use Cholesky decomposition for numerical stability when dealing
    with B
```

1120

```

> 28:         L = np.linalg.cholesky(B)
> 29:         Linv = np.linalg.inv(L)
> 30:         Atilde = Linv @ A @ Linv.T
> 31:
> 32:         # Compute eigenvalues and eigenvectors
> 33:         eigenvalues, eigenvectors = np.linalg.eigh(Atilde)
> 34:
> 35:         # Transform eigenvectors back to the original space
> 36:         eigenvectors = Linv.T @ eigenvectors
> 37:
> 38:         # Normalize eigenvectors with respect to the B-inner product
> 39:         for i in range(eigenvectors.shape[1]):
> 40:             v = eigenvectors[:, i]
> 41:             norm = np.sqrt(np.dot(v, B @ v))
> 42:             if norm > 0:
> 43:                 eigenvectors[:, i] = v / norm
> 44:
> 45:         # Reverse to get descending order
> 46:         eigenvalues = eigenvalues[::-1]
> 47:         eigenvectors = eigenvectors[:, ::-1]
> 48:
> 49:         # Convert to lists
> 50:         eigenvalues_list = eigenvalues.tolist()
...

```

```

Speedup: 1.00x
(Speedup = Baseline Time / Your Time; Higher is better)

```

```

Valid Solutions: 100%
Invalid Solutions: 0%
Timeouts: 0%

```

```

Snapshot saved (Best speedup reached, state saved!)

```

1121

## 1122 C.2.2 Linter Errors

### LM Message

I'll create the solver.py file with our numba-accelerated implementation using the proper prepend command.

```

edit
file: solver.py
lines: 0-0
---
import numpy as np
from numba import njit

# Global up and down factors. These might be overridden externally.
up = 1
down = 1

@njit(cache=True)
def _upfirdn1d_numba(h, x, up, down):
    Lx = x.shape[0]
    Lh = h.shape[0]
    # The length of the convolved signal after upsampling.
    Lfull = (Lx - 1) * up + Lh
    # Compute the length of the output after downsampling.

```

1123

```

Lout = (Lfull - 1) // down + 1
y = np.zeros(Lout, dtype=x.dtype)
for n in range(Lout):
    pos = n * down
    s = 0.0
    kmin = 0
    if pos - (Lx - 1) * up > 0:
        kmin = pos - (Lx - 1) * up
    kmax = pos
    if kmax > Lh - 1:
        kmax = Lh - 1
    for k in range(kmin, kmax + 1):
        r = pos - k
        if r % up == 0:
            m = r // up
            if m < Lx:
                s += x[m] * h[k]
    y[n] = s
return y

def solve(problem: list) -> list:
    """
    Compute the upfirdn operation for each filter-signal pair in the problem
    list.

    Each tuple (h, x) is processed by upsampling x by factor 'up', filtering
    with h, and then downsampling by factor 'down'.

    :param problem: A list of tuples (h, x) where h and x are 1D arrays.
    :return: A list of 1D arrays representing the upfirdn results.
    """
    results = []
    for h, x in problem:
        h_arr = np.ascontiguousarray(np.array(h, dtype=np.float64))
        x_arr = np.ascontiguousarray(np.array(x, dtype=np.float64))
        res = _upfirdn1d_numba(h_arr, x_arr, up, down)
        results.append(res)
    return results
---
```

1124

#### System Message

You have sent 2 messages and have used up \$0.0304. You have \$0.0696 remaining.

Edit failed (and thus not applied) for solver.py: Line 9: Redefining name 'up' from outer scope (line 5) (redefined-outer-name)  
Line 9: Redefining name 'down' from outer scope (line 6) (redefined-outer-name)

PROPOSED CHANGES - This is what you tried to apply (lines 1-50 out of 50):  
(| = existing code, > = modified code)

```

> 01: import numpy as np
> 02: from numba import njit
> 03:
> 04: # Global up and down factors. These might be overridden externally.
> 05: up = 1
> 06: down = 1
> 07:
> 08: @njit(cache=True)
> 09: def _upfirdn1d_numba(h, x, up, down):
```

1125

```

> 10:     Lx = x.shape[0]
> 11:     Lh = h.shape[0]
> 12:     # The length of the convolved signal after upsampling.
> 13:     Lfull = (Lx - 1) * up + Lh
> 14:     # Compute the length of the output after downsampling.
> 15:     Lout = (Lfull - 1) // down + 1
> 16:     y = np.zeros(Lout, dtype=x.dtype)
> 17:     for n in range(Lout):
> 18:         pos = n * down
> 19:         s = 0.0
> 20:         kmin = 0
> 21:         if pos - (Lx - 1) * up > 0:
> 22:             kmin = pos - (Lx - 1) * up
> 23:         kmax = pos
> 24:         if kmax > Lh - 1:
> 25:             kmax = Lh - 1
> 26:         for k in range(kmin, kmax + 1):
> 27:             r = pos - k
> 28:             if r % up == 0:
> 29:                 m = r // up
> 30:                 if m < Lx:
> 31:                     s += x[m] * h[k]
> 32:         y[n] = s
> 33:     return y
> 34:
> 35: def solve(problem: list) -> list:
> 36:     """
> 37:     Compute the upfirdn operation for each filter-signal pair in the
> 38:     problem list.
> 39:     Each tuple (h, x) is processed by upsampling x by factor 'up',
> 40:     filtering with h, and then downsampling by factor 'down'.
> 41:     :param problem: A list of tuples (h, x) where h and x are 1D arrays.
> 42:     :return: A list of 1D arrays representing the upfirdn results.
> 43:     """
> 44:     results = []
> 45:     for h, x in problem:
> 46:         h_arr = np.ascontiguousarray(np.array(h, dtype=np.float64))
> 47:         x_arr = np.ascontiguousarray(np.array(x, dtype=np.float64))
> 48:         res = _upfirdn1d_numba(h_arr, x_arr, up, down)
> 49:         results.append(res)
> 50:     return results

Contents of current file:
File solver.py is empty.

```

1126

### 1127 C.2.3 Runtime Errors

#### LM Message

```

...
eval_input [[1.2, -0.5], [0.3, 2.1]]
...

```

1128

### System Message

You have sent 0 messages and have used up \$0.2630. You have \$0.2370 remaining.

Starting evaluation...

`numpy.linalg.LinAlgError: 0-dimensional array given. Array must be at least two-dimensional in function 'solve' at line 22 in solver.py`

Code Context:

```
12:      """
13:      Solve the eigenvector problem for the given non-symmetric matrix.

14:      Compute eigenvalues and eigenvectors using np.linalg.eig.
15:      Sort the eigenpairs in descending order by the real part (and
    then imaginary part) of the eigenvalues.
16:      Return the eigenvectors (each normalized to unit norm) as a list
    of lists of complex numbers.
17:
18:      :param problem: A non-symmetric square matrix.
19:      :return: A list of normalized eigenvectors sorted in descending
    order.
20:      """
21:      A = problem
! 22:      eigenvalues, eigenvectors = np.linalg.eig(A)
23:      # Zip eigenvalues with corresponding eigenvectors (columns of
    eigenvectors matrix)
24:      pairs = list(zip(eigenvalues, eigenvectors.T))
25:      # Sort by descending order of eigenvalue real part, then
    imaginary part
26:      pairs.sort(key=lambda pair: (-pair[0].real, -pair[0].imag))
27:      sorted_evecs = []
28:      for _, vec in pairs:
29:          vec_arr = np.array(vec, dtype=complex)
30:          norm = np.linalg.norm(vec_arr)
31:          if norm > 1e-12:
32:              vec_arr = vec_arr / norm
```

1129

## 1130 E Python Packages

1131 In Table 7 we show the Python packages used AlgoTune, as well as packages installed on the  
 1132 AlgoTuner agent interface.

Table 7: Python packages used in the AlgoTune benchmark, installed on the AlgoTune Agent interface, and their open-source licenses.

| Package                                              | AlgoTune (Benchmark) | AlgoTuner (Agent) | License      |
|------------------------------------------------------|----------------------|-------------------|--------------|
| NumPy (Harris et al., 2020)                          | ✓                    | ✓                 | BSD 3-Clause |
| SciPy (Virtanen et al., 2020)                        | ✓                    | ✓                 | BSD 3-Clause |
| Pandas (McKinney, 2010)                              | ✗                    | ✓                 | BSD 3-Clause |
| Cython (Behnel et al., 2011)                         | ✗                    | ✓                 | Apache 2.0   |
| Numba (Lam et al., 2015)                             | ✗                    | ✓                 | BSD 2-Clause |
| Dask (Rocklin, 2015)                                 | ✗                    | ✓                 | BSD 3-Clause |
| PuLP (Mitchell et al., 2009)                         | ✓                    | ✓                 | MIT          |
| OR-Tools (Google, 2020)                              | ✓                    | ✓                 | Apache 2.0   |
| Pyomo (Hart et al., 2011)                            | ✗                    | ✓                 | BSD 3-Clause |
| HiGHS / HighSpy (Huangfu and Hall, 2018)             | ✗                    | ✓                 | MIT          |
| NetworkX (Hagberg et al., 2008)                      | ✓                    | ✓                 | BSD 3-Clause |
| python-sat (Biere et al., 2012)                      | ✓                    | ✓                 | MIT          |
| JAX (Bradbury et al., 2018)                          | ✗                    | ✓                 | Apache 2.0   |
| DiffraX (Kidger, 2021)                               | ✓                    | ✓                 | Apache 2.0   |
| CVXPY (Agrawal et al., 2018; Diamond and Boyd, 2016) | ✓                    | ✓                 | Apache 2.0   |

## 1133 F Performance Improvements in Python Repositories

1134 In this section, we show a sample of performance improving pull requests to three Python repositories:  
1135 NumPy, SciPy, and NetworkX. All of the below pull requests were submitted in the past two years,  
1136 and greatly increase performance (as reported in the PR itself). For each PR, we highlight the most  
1137 significant reported performance greatest improvement.

1138 NumPy:

- 1139 • **ENH: Add a fast-path for `ufunc.at` on aligned 1D arrays** (PR #22889): Up to 6.3x faster  
1140 when no casting is needed on 1D aligned inputs (e.g. `bench_ufunc.At.time_sum_at`  
1141 dropped from  $54.0 \pm 0.2$  ms to  $8.42 \pm 0.02$  ms). [https://github.com/numpy/numpy/  
1142 pull/22889](https://github.com/numpy/numpy/pull/22889)
- 1143 • **ENH: Vectorize quicksort for 16-bit and 64-bit dtype using AVX512** (PR #22315): Up  
1144 to 15x speedup for 16-bit sorts and 9x speedup for 64-bit sorts on AVX-512-capable CPUs.  
1145 <https://github.com/numpy/numpy/pull/22315>
- 1146 • **ENH: Accelerate unique for integer dtypes via hash tables** (PR #26018): Roughly 2.7x  
1147 speedup on 1 billion random integers (unique count in 7.815 s vs. 21.436 s for the previous  
1148 implementation). <https://github.com/numpy/numpy/pull/26018>

1149 SciPy:

- 1150 • **ENH: Vectorize `stats.mannwhitneyu`** (PR #19749): Vectorizes the statistic calculation,  
1151 achieving up to  $\sim 21$ x speedup ( $1.38$  s  $\rightarrow$   $64.4$  ms in certain cases). [https://github.com/  
1152 scipy/scipy/pull/19749](https://github.com/scipy/scipy/pull/19749)
- 1153 • **ENH: Vectorize `stats.rankdata`** (PR #19776): Vectorizes `rankdata` along an axis,  
1154 yielding up to  $\sim 296$ x faster runtimes ( $2.58$  ms  $\rightarrow$   $8.7$   $\mu$ s for a  $(100, 100)$  array). [https:  
1155 //github.com/scipy/scipy/pull/19776](https://github.com/scipy/scipy/pull/19776)
- 1156 • **ENH: Fast-path for sparse Frobenius norm** (PR #14317): Directly accesses the data array  
1157 to compute the norm, resulting in up to 5x speedup in some cases. [https://github.com/  
1158 scipy/scipy/pull/14317](https://github.com/scipy/scipy/pull/14317)

1159 NetworkX:

- 1160 • **BUG: Fix `weakly_connected_components()` performance on graph views**  
1161 (PR #7586): Moves the repeated `len(G)` call outside the loop, cutting runtime from  $\sim 15.4$  s  
1162 to  $0.064$  s per iteration, over  $240\times$  faster. [https://github.com/networkx/networkx/  
1163 pull/7586](https://github.com/networkx/networkx/pull/7586)
- 1164 • **ENH: Speed up `harmonic centrality`** (PR #7595): Implements graph reversal for node-  
1165 subset queries, reducing computation on large wheel graphs from  $95.9$ ms to  $717$   $\mu$ s,  $134$ x  
1166 faster. <https://github.com/networkx/networkx/pull/7595>
- 1167 • **ENH: Speed up `common_neighbors / non_neighbors`** (PR #7244): Replaces generator-  
1168 based neighbor lookups with direct `_adj dict` operations, achieving up to  $\sim 600$ x speedup  
1169 on star-center queries and around  $11$ x on complete-graph common neighbors. [https:  
1170 //github.com/networkx/networkx/pull/7244](https://github.com/networkx/networkx/pull/7244)



## 1171 G AlgoTune vs KernelBench

1172 Concurrent work, KernelBench (Ouyang et al., 2025) is similar to AlgoTune: both are code optimiza-  
1173 tion benchmarks. In this section, we summarize the main differences between them.

1174 KernelBench is made up of 250 GPU kernels, where the goal is to write highly optimized low level  
1175 code that speeds up their runtime, while still producing correct outputs. KernelBench is split into  
1176 three levels based on kernel complexity. The first level contains simple functions like softmax or  
1177 tanh, while the third level contains more complex kernels like ShuffleNet or LSTM.

1178 This approach has two downsides: first, the runtimes of kernels in the benchmark is highly varied;  
1179 level 1 kernels run in microseconds, while level 3 kernels run in milliseconds (see Table 8). 40.8% of  
1180 the kernels in KernelBench run in under 0.1 milliseconds, while the rest take between 0.1 and 100  
1181 milliseconds to run. Kernels with low runtimes are harder to optimize, as the process overhead takes  
1182 a significant part of the runtime. This makes the comparison between the improvement of different  
1183 kernel runtimes somewhat complicated.

1184 In contrast, AlgoTune’s tasks have controllable runtimes, which results in the benchmark having  
1185 more uniform runtimes (see I). Importantly, AlgoTune covers a broad range of functions in math,  
1186 science, computer science, machine learning, and more (see §1 for a discussion).

Table 8: Number of kernels per time interval as reported by Ouyang (2025), for KernelBench (Ouyang et al., 2025), by level.

| Time Interval  | Level 1 (100 ops) | Level 2 (100 ops) | Level 3 (50 ops) | Pct of Total [%] |
|----------------|-------------------|-------------------|------------------|------------------|
| 10–20 $\mu$ s  | 21                | 0                 | 0                | 8.4              |
| 20–50 $\mu$ s  | 24                | 12                | 0                | 14.4             |
| 50–100 $\mu$ s | 4                 | 37                | 4                | 18.0             |
| 0.1–1 ms       | 22                | 21                | 8                | 20.4             |
| 1–10 ms        | 23                | 20                | 20               | 25.2             |
| 10–100 ms      | 6                 | 10                | 18               | 13.6             |

## 1187 H Task Size Determination

1188 Algorithm 1 shows the two phase search algorithm used to find the problem size parameter  $n$  for each  
 1189 Task in the benchmark.

---

**Algorithm 1** FINDKFOR TIME — choose  $n$  whose mean solve time best matches target time  $\tau$

---

**Require:** task  $T$ ; target time  $\tau$ ; bounds  $[k_{\min}, k_{\max}]$ ; examples  $m$ ; seed  $s$ ; initial samples  $n_{\text{init}}$ ; refinement steps  $n_{\text{ref}}$

**Ensure:** estimate  $\hat{k}$  (or  $\emptyset$  if none succeeds)

```

1: function PROBE( $k$ )
2:   if  $k \in \text{cache}$  then
3:     return cache[ $k$ ]
4:   end if
5:    $(t_k, \text{stats}) \leftarrow \text{measure\_solve\_time}(T, k, \tau, m, s, \dots)$ 
6:   cache[ $k$ ]  $\leftarrow (t_k, \text{stats})$ 
7:   return  $(t_k, \text{stats})$ 
8: end function
9: cache  $\leftarrow$  empty map
10: if  $k_{\min} = k_{\max}$  then
11:   return PROBE( $k_{\min}$ )
12: end if
13:  $\mathcal{K}_{\text{sample}} \leftarrow \{ \lfloor 10^x \rfloor : x \in \text{linspace}(\log_{10} k_{\min}, \log_{10} k_{\max}, n_{\text{init}}) \} \cup \{k_{\min}, k_{\max}\}$ 
14: sort  $\mathcal{K}_{\text{sample}}$  and deduplicate
15:  $k_{\text{lastOK}} \leftarrow \emptyset$ ,  $k_{\text{upper}} \leftarrow \emptyset$ 
16: for all  $k \in \mathcal{K}_{\text{sample}}$  do
17:    $(t_k, \_)$   $\leftarrow$  PROBE( $k$ )
18:   if  $t_k = \emptyset \vee t_k > \tau$  then
19:     if  $k_{\text{lastOK}} \neq \emptyset$  then
20:        $k_{\text{upper}} \leftarrow k$ ; break
21:     end if
22:   else
23:      $k_{\text{lastOK}} \leftarrow k$ 
24:   end if
25: end for
26:  $\hat{k} \leftarrow \arg \min_{(k, t_k) \in \text{cache}, t_k \neq \emptyset} (|t_k - \tau|, k)$ 
27: if  $k_{\text{lastOK}} \neq \emptyset$  and  $k_{\text{upper}} \neq \emptyset$  then
28:    $lo \leftarrow k_{\text{lastOK}}$ ,  $hi \leftarrow k_{\text{upper}}$ 
29:   for  $i = 1$  to  $n_{\text{ref}}$  do
30:     if  $hi - lo \leq 1$  then break
31:     end if
32:      $mid \leftarrow \lfloor (lo + hi)/2 \rfloor$ 
33:      $(t_{mid}, \_)$   $\leftarrow$  PROBE( $mid$ )
34:     if  $t_{mid} \neq \emptyset$  and  $(|t_{mid} - \tau|, mid) < (|t_{\hat{k}} - \tau|, \hat{k})$  then
35:        $\hat{k} \leftarrow mid$ 
36:     end if
37:     if  $t_{mid} = \emptyset \vee t_{mid} > \tau$  then
38:        $hi \leftarrow mid - 1$ 
39:     else
40:        $lo \leftarrow mid$ 
41:     end if
42:   end for
43: end if
44: return  $\hat{k}$ 

```

---

## 1190 I Task Timings

1191 We report the size parameter  $n$  and per task timings in Table 9. The average time per task is calculated  
 1192 by running the reference solver on 100 development instances, and repeating this three times.

Table 9: Per task size parameter  $n$  values and average time for the reference solve function, across three timing runs.

| Task                             | n      | Average Time (ms) |
|----------------------------------|--------|-------------------|
| affine_transform_2d              | 520    | $17.46 \pm 0.14$  |
| articulation_points              | 841    | $98.41 \pm 0.48$  |
| base64_encoding                  | 2387   | $4.41 \pm 0.01$   |
| btsp                             | 8      | $0.82 \pm 0.02$   |
| capacitated_facility_location    | 6      | $263.55 \pm 1.69$ |
| chacha_encryption                | 3196   | $0.99 \pm 0.00$   |
| channel_capacity                 | 138    | $96.18 \pm 0.25$  |
| chebyshev_center                 | 242    | $101.06 \pm 0.58$ |
| cholesky_factorization           | 668    | $8.77 \pm 0.18$   |
| clustering_outliers              | 2359   | $92.37 \pm 0.39$  |
| communicability                  | 61     | $98.25 \pm 1.79$  |
| convex_hull                      | 191235 | $20.19 \pm 0.33$  |
| convex_quadratic_check           | 605    | $100.75 \pm 1.84$ |
| convolve2d_full_fill             | 6      | $147.48 \pm 0.23$ |
| convolve_1d                      | 16325  | $15.32 \pm 0.09$  |
| correlate_1d                     | 88     | $10.12 \pm 0.04$  |
| count_connected_components       | 794    | $16.09 \pm 0.10$  |
| count_riemann_zeta_zeros         | 15849  | $68.00 \pm 0.18$  |
| crew_pairing                     | 343    | $131.36 \pm 1.00$ |
| cumulative_simpson_multid        | 67     | $10.01 \pm 0.50$  |
| cyclic_independent_set           | 4      | $87.97 \pm 0.17$  |
| determinant_matrix_exponential   | 662    | $10.04 \pm 0.02$  |
| dijkstra_from_indices            | 1607   | $9.88 \pm 0.02$   |
| discrete_log                     | 25     | $19.72 \pm 0.16$  |
| dynamic_assortment_planning      | 36     | $99.46 \pm 0.94$  |
| earth_movers_distance            | 409    | $9.26 \pm 0.05$   |
| edge_expansion                   | 8507   | $67.99 \pm 0.38$  |
| efficiency                       | 500    | $101.01 \pm 0.40$ |
| eigenvalues_complex              | 476    | $99.02 \pm 0.21$  |
| eigenvalues_real                 | 358    | $10.10 \pm 0.02$  |
| eigenvectors_complex             | 467    | $99.26 \pm 0.08$  |
| eigenvectors_real                | 445    | $19.36 \pm 0.13$  |
| elementwise_integration          | 378    | $101.44 \pm 0.04$ |
| feedback_controller_design       | 12     | $79.83 \pm 0.33$  |
| fft_real_scipy_fftpack           | 631    | $8.14 \pm 0.03$   |
| generalized_eigenvalues_complex  | 275    | $103.61 \pm 0.05$ |
| generalized_eigenvalues_real     | 363    | $20.12 \pm 0.08$  |
| generalized_eigenvectors_complex | 272    | $102.09 \pm 0.21$ |
| generalized_eigenvectors_real    | 236    | $9.92 \pm 0.05$   |
| graph_coloring_assign            | 42     | $101.39 \pm 0.20$ |
| graph_isomorphism                | 127    | $92.04 \pm 0.12$  |
| graph_laplacian                  | 4839   | $10.03 \pm 0.12$  |
| gzip_compression                 | 653    | $99.40 \pm 0.01$  |
| job_shop_scheduling              | 17     | $99.40 \pm 6.36$  |
| kalman_filter                    | 23     | $97.41 \pm 0.33$  |
| kcenters                         | 33     | $9.63 \pm 0.02$   |
| kd_tree                          | 77     | $10.13 \pm 0.05$  |
| kernel_density_estimation        | 631    | $199.79 \pm 0.25$ |
| kmeans                           | 278    | $96.28 \pm 0.38$  |
| ks_test_2samp                    | 50610  | $9.97 \pm 0.06$   |
| l0_pruning                       | 83829  | $9.95 \pm 0.13$   |
| l1_pruning                       | 96069  | $19.84 \pm 0.22$  |

Continued on next page

Table 9 – continued from previous page

| Task                         | $n$     | Average Time (ms)   |
|------------------------------|---------|---------------------|
| lasso                        | 87      | $10.14 \pm 0.09$    |
| linear_system_solver         | 532     | $10.01 \pm 0.04$    |
| lp_box                       | 297     | $100.38 \pm 0.59$   |
| lp_centering                 | 304     | $105.24 \pm 0.32$   |
| lqr                          | 111     | $99.62 \pm 1.41$    |
| lu_factorization             | 497     | $17.62 \pm 0.19$    |
| markowitz                    | 396     | $103.83 \pm 0.25$   |
| matrix_exponential           | 552     | $98.32 \pm 0.68$    |
| matrix_multiplication        | 298     | $11.27 \pm 0.09$    |
| matrix_sqrt                  | 281     | $100.40 \pm 0.21$   |
| max_clique                   | 17      | $88.86 \pm 2.94$    |
| max_common_subgraph          | 4       | $24.21 \pm 0.49$    |
| max_flow_min_cost            | 63      | $99.08 \pm 1.20$    |
| max_independent_set          | 15      | $55.09 \pm 1.68$    |
| max_weighted_independent_set | 27      | $10.83 \pm 0.82$    |
| min_weight_assignment        | 233     | $9.58 \pm 0.01$     |
| minimum_spanning_tree        | 574     | $101.43 \pm 0.62$   |
| minimum_volume_ellipsoid     | 27      | $115.07 \pm 0.78$   |
| multi_dim_knapsack           | 215     | $192.66 \pm 18.89$  |
| nmf                          | 6       | $83.00 \pm 0.07$    |
| ode_fitzhughnagumo           | 17      | $81.52 \pm 0.16$    |
| ode_hires                    | 706     | $120.77 \pm 0.38$   |
| ode_lorenz96_nonchaotic      | 3       | $25.78 \pm 0.23$    |
| ode_nbodyproblem             | 9       | $113.80 \pm 0.73$   |
| ode_stiff_robertson          | 9999999 | $82.71 \pm 0.15$    |
| ode_stiff_vanderpol          | 2       | $111.07 \pm 0.55$   |
| odr                          | 17637   | $45.08 \pm 0.02$    |
| pagerank                     | 7978    | $76.79 \pm 0.54$    |
| pca                          | 36      | $105.81 \pm 0.59$   |
| pde_burgers1d                | 12      | $103.34 \pm 0.52$   |
| pde_heat1d                   | 9       | $98.58 \pm 0.66$    |
| polynomial_mixed             | 415     | $103.33 \pm 2.37$   |
| polynomial_real              | 396     | $99.12 \pm 0.09$    |
| portfolio_optimization_cvar  | 15      | $97.71 \pm 0.24$    |
| procrustes                   | 307     | $19.76 \pm 0.09$    |
| psd_cone_projection          | 349     | $100.60 \pm 0.11$   |
| qp                           | 278     | $97.59 \pm 0.15$    |
| qr_factorization             | 500     | $18.42 \pm 0.56$    |
| quantile_regression          | 187     | $98.70 \pm 0.82$    |
| queens_with_obstacles        | 14      | $142.63 \pm 3.12$   |
| queuing                      | 420     | $4.83 \pm 0.01$     |
| qz_factorization             | 271     | $99.88 \pm 0.22$    |
| randomized_svd               | 310     | $10.23 \pm 0.02$    |
| rbf_interpolation            | 85      | $68.17 \pm 0.12$    |
| rectanglepacking             | 10      | $341.44 \pm 150.17$ |
| robust_linear_program        | 12      | $99.10 \pm 0.41$    |
| rotate_2d                    | 506     | $18.41 \pm 0.08$    |
| set_cover_conflicts          | 9       | $9.90 \pm 1.05$     |
| set_cover                    | 74      | $154.40 \pm 11.25$  |
| sha256_hashing               | 1818    | $1.00 \pm 0.00$     |
| shift_2d                     | 555     | $18.72 \pm 0.02$    |
| shortest_path_dijkstra       | 352     | $100.62 \pm 0.27$   |
| sparse_eigenvectors_complex  | 1561    | $183.99 \pm 0.35$   |
| spectral_clustering          | 27      | $133.05 \pm 1.21$   |
| stable_matching              | 471     | $9.60 \pm 0.03$     |
| toeplitz_solver              | 8588    | $101.29 \pm 2.20$   |
| tsp                          | 39      | $106.21 \pm 26.47$  |
| two_eigenvalues_around_0     | 568     | $19.76 \pm 0.12$    |
| unit_simplex_projection      | 127543  | $9.86 \pm 0.10$     |
| vector_quantization          | 30      | $9.97 \pm 0.00$     |
| vectorized_newton            | 40684   | $4.99 \pm 0.02$     |

Continued on next page

Table 9 – continued from previous page

| Task                    | $n$   | Average Time (ms) |
|-------------------------|-------|-------------------|
| vehicle_routing         | 14    | $91.82 \pm 1.85$  |
| vehicle_routing_circuit | 8     | $140.19 \pm 2.36$ |
| vertex_cover            | 1     | $9.83 \pm 1.12$   |
| vertex_cover_cpsat      | 17    | $79.95 \pm 1.28$  |
| wasserstein_dist        | 15439 | $19.17 \pm 0.11$  |
| water_filling           | 4075  | $98.59 \pm 0.65$  |
| zoom_2d                 | 480   | $26.06 \pm 0.15$  |
